# Supplementary material
Source: MDPI journal article supplement (https://www.mdpi.com/2220-9964/7/5/171)
Supplement: s1 [file s1]

# BugMap

Un'applicazione smartphone per monitorare  
la presenza della cimice asiatica che sta  
invadendo il Trentino

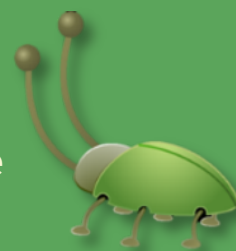

f #bugmap

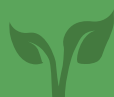

1

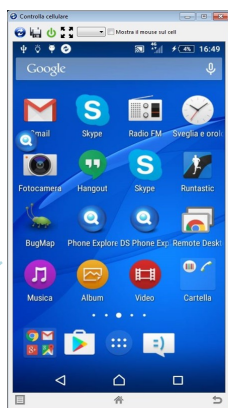

Scarica

BugMap gratuitamente  
su Google Play Store  
[www.http://meteo.fmach.it/meteo/bugMap.php](http://meteo.fmach.it/meteo/bugMap.php)

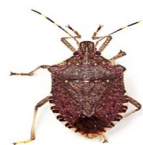

2

Hai identificato  
una **cimice  
asiatica?**

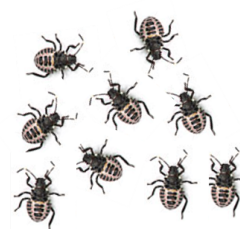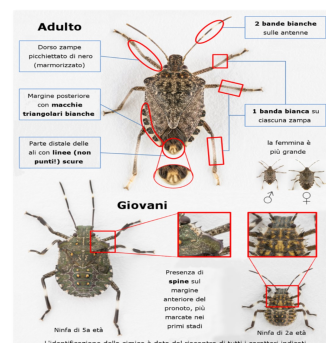

3

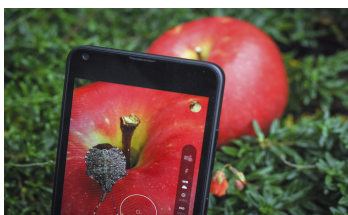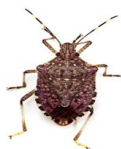

Ogni cittadino può  
**segnalare**  
la presenza  
dell'insetto con  
BugMap!
